# Supplementary material
Source: publisher site journal article supplement (https://www.dovepress.com/article/385682)
Supplement: Supplementary file 1 [file get_supplementary_file.php]

**Supplement for the Manuscript: “Qualitative Exploration in Exit Interviews of Changes Observed in Clinical Trials for Individuals with Autism Spectrum Disorder without Intellectual Disability”**

Table S1. List of Sites and IRBs (aV1ation Study)

| **Site Number** | **Local/Central IRB and Local IRB Address** |
| --- | --- |
| 293537 | Central IRB  Advarra  6940 Columbia Gateway Dr. Suite 110  Columbia, MD 21046 |
| 293538 | Central IRB  Advarra  6940 Columbia Gateway Dr. Suite 110  Columbia, MD 21046 |
| 293685 | Central IRB  Advarra  6940 Columbia Gateway Dr. Suite 110  Columbia, MD 21046 |
| 293686 | WIRB  1019 39th Avenue SE Suite 120  Puyallup, WA 98374-2115 |
| 293687 | Central IRB  Advarra  6940 Columbia Gateway Dr. Suite 110  Columbia, MD 21046 |
| 293688 | Advarra (local IRB Chesepeake acquired by Quorum/Advarra; still considered local for this study)  6940 Columbia Gateway Dr. Suite 110  Columbia, MD 21046 |
| 293690 | Central IRB  Advarra  6940 Columbia Gateway Dr. Suite 110  Columbia, MD 21046 |
| 293691 | Central IRB  Advarra  6940 Columbia Gateway Dr. Suite 110  Columbia, MD 21046 |
| 293692 | Central IRB  Advarra  6940 Columbia Gateway Dr. Suite 110  Columbia, MD 21046 |
| 293693 | Vanderbilt HRPP IRB  1313 21st Ave South Suite 505  Nashville, TN 37232 |
| 293694 | Central IRB  Advarra  6940 Columbia Gateway Dr. Suite 110  Columbia, MD 21046 |
| 294087 | DukeHealth IRB  2424 Erwin Rd  Suite 405  Durham, NC 27705 |
| 294088 | Central IRB  Advarra  6940 Columbia Gateway Dr. Suite 110  Columbia, MD 21046 |
| 294105 | BRANY IRB  1981 Marcus Ave  Suite 210  Lake Success, NY 11042 |
| 294106 | Yale HRPP IRB  25 Science Park, 3rd Fl, 150 Munson St  New Haven, CT 06520-8327 |
| 294107 | UCSF HRPP IRB  490 Illinois Street  Floor 6  San Francisco, CA 94143 |
| 294108 | Central IRB  Advarra  6940 Columbia Gateway Dr. Suite 110  Columbia, MD 21046 |
| 295491 | Central IRB  Advarra  6940 Columbia Gateway Dr. Suite 110  Columbia, MD 21046 |
| 295492 | Cincinnati Children's Hospital IRB  3333 Burnet Avenue  MLC 7040  Cincinnati, OH 45229 |
| 295534 | University of Massachusetts Medical School IRB  Venture Way Center  100 Venture Way, Suite 201  Hadley, MA 01035-9450 |
| 295535 | Central IRB  Advarra  6940 Columbia Gateway Dr. Suite 110  Columbia, MD 21046 |
| 295536 | Central IRB  Advarra  6940 Columbia Gateway Dr. Suite 110  Columbia, MD 21046 |
| 295537 | Central IRB  Advarra  6940 Columbia Gateway Dr. Suite 110  Columbia, MD 21046 |
| 295538 | Central IRB  Advarra  6940 Columbia Gateway Dr. Suite 110  Columbia, MD 21046 |
| 295539 | Mass General Brigham IRB  399 Revolution Drive  Suite 710  Somerville, MA 02145 |
| 295540 | Central IRB  Advarra  6940 Columbia Gateway Dr. Suite 110  Columbia, MD 21046 |
| 295541 | Central IRB  Advarra  6940 Columbia Gateway Dr. Suite 110  Columbia, MD 21046 |
| 295544 | Weill Cornell Medicine IRB  Mailing Address:  1300 York Avenue Box 89 New York, NY 10065 Office Address:  575 Lexington Avenue 9th Floor  New York, NY 10022 |
| 295781 | Rush University Medical Center IRB  Office of Research Affairs 1653 West Congress Parkway  Chicago, Illinois 61612-3833 |
| 295804 | Central IRB  Advarra  6940 Columbia Gateway Dr. Suite 110  Columbia, MD 21046 |
| 296372 | Partners Human Research  399 Revolution Drive  Suite 710  Somerville, MA 02145 |
| 296761 | Central IRB  Advarra  6940 Columbia Gateway Dr. Suite 110  Columbia, MD 21046 |
| 296871 | WIRB  1019 39th Avenue SE Suite 120  Puyallup, WA 98374-2115 |
| 296872 | WIRB  1019 39th Avenue SE Suite 120  Puyallup, WA 98374-2115 |
| 296873 | WIRB  1019 39th Avenue SE Suite 120  Puyallup, WA 98374-2115 |
| 296935 | Central IRB  Advarra  6940 Columbia Gateway Dr. Suite 110  Columbia, MD 21046 |
| 297189 | Boston Children's Hospital IRB  300 Longwood Avenue  Mailstop BCH 3164  Boston, MA 02115 |
| 301182 | Nathan Kline Institute IRB  140 Old Orangeburg Rd  Orangeburg, NY 10962 |
| 307562 | Central IRB  Advarra  6940 Columbia Gateway Dr. Suite 110  Columbia, MD 21046 |
| 307563 | Central IRB  Advarra  6940 Columbia Gateway Dr. Suite 110  Columbia, MD 21046 |
| 307598 | Central IRB  Advarra  6940 Columbia Gateway Dr. Suite 110  Columbia, MD 21046 |
| 309514 | Central IRB  Advarra  6940 Columbia Gateway Dr. Suite 110  Columbia, MD 21046 |
| 309517 | Central IRB  Advarra  6940 Columbia Gateway Dr. Suite 110  Columbia, MD 21046 |
| 311098 | John Hopkins Medicine IRB  1620 McElderry Street Reed Hall, Suite B-130  Baltimore, MD 21205-1911 |

Abbreviations: IRB, Institutional Review Board

Table S2. List of Sites and ECs/IRBs (V1aduct Study)

| **Site Number** | **EC/IRB Name and Address** |
| --- | --- |
| 299632 | Advarra  6940 Columbia Gateway Drive  Columbia, MD, 21046  United States |
| 299634 | Advarra  6940 Columbia Gateway Drive  Columbia, MD, 21046  United States |
| 299635 | Yale University School of Medicine - Human Investigation Committee  47 College Street, Suite 204, P.O. Box 208010  New Haven, CT, 06520  United States |
| 299636 | Advarra  6940 Columbia Gateway Drive  Columbia, MD, 21046  United States |
| 299638 | Advarra  6940 Columbia Gateway Drive  Columbia, MD, 21046  United States |
| 299639 | Chesapeake Research Review; IRB  6940 Columbia Gateway Drive, Suite 110  Columbia, MD, 21046  United States |
| 299640 | Advarra  6940 Columbia Gateway Drive  Columbia, MD, 21046  United States |
| 299645 | NKI/RPC IRB  140 Old Orangeburg Road, Bld 57 Rockland Psychiatric Center Pharmacy  Orangeburg, NY, 10962  United States |
| 299646 | Rush University Medical Center; Rush University Medical Center Institutional Review Board, Office of Research Affairs  1653 W. Congress Parkway  Chicago, IL, 60612  United States |
| 299648 | The University of Chicago IRB  5841 S. Maryland Ave.  Chicago, IL, 60637  United States |
| 299721 | Advarra Inc.  300-372 Hollandview Trail, L4G 0A5, Aurora, Ontario  Canada |
| 299724 | Advarra  6940 Columbia Gateway Drive  Columbia, MD, 21046  United States |
| 299725 | Advarra  6940 Columbia Gateway Drive  Columbia, MD, 21046  United States |
| 299726 | Advarra  6940 Columbia Gateway Drive  Columbia, MD, 21046  United States |
| 299727 | Advarra  6940 Columbia Gateway Drive  Columbia, MD, 21046  United States |
| 299728 | Advarra  6940 Columbia Gateway Drive  Columbia, MD, 21046  United States |
| 299808 | Lehigh Valley Health Network IRB  1019 39th Avenue SE, Suite 120  Puyallup, WA, 98374-2115 United States |
| 299896 | Advarra  6940 Columbia Gateway Drive  Columbia,, MD, 21046  United States |
| 299913 | Lehigh Valley Health Network IRB  1019 39th Avenue SE, Suite 120  Puyallup, WA, 98374-2115  United States |
| 299915 | Advarra  6940 Columbia Gateway Drive  Columbia, MD, 21046  United States |
| 299932 | Advarra  6940 Columbia Gateway Drive  Columbia, MD, 21046  United States |
| 299998 | Advarra  6940 Columbia Gateway Drive  Columbia, MD, 21046  United States |
| 300157 | North East - Tyne & Wear South Research Ethics Committee  Jarrow Business Centre  Viking Business Centre, Jarrow, NE32 3DT  United Kingdom |
| 301470 | CPP Ouest V, CHU de Pontchaillou  9 Avenue de la Bataille Flandre Dunkerque, 35033, Rennes  France |
| 301484 | CPP Ouest V, CHU de Pontchaillou  9 Avenue de la Bataille Flandre Dunkerque, 35033, Rennes  France |
| 301624 | Western IRB  1019 39th Avenue SE, Suite 120  Puyallup, WA, 98374  United States |
| 301624 | Western University Health Science Research Ethics Board  Support Services Bldg, Rm 5150, London, ON, N6G 1G9, London, Ontario  Canada |
| 301777 | Western University Health Science Research Ethics Board, Support Services Bldg, Rm 5150, London, ON, N6G 1G9, London, Ontario  Canada |
| 301864 | Comitato Etico Catania 1  Via S. Sofia 78, 95123, Catania, Sicilia  Italy |
| 301970 | - |
| 301972 | A.O. Città della salute e della scienza di Torino; Comitato Etico  Corso Bramante 88/90, 10126, Torino, Piemonte  Italy |
| 301974 | Comitato Etico Referente per l'Area di Pavia  Viale Golgi 19, 27100, Pavia, Lombardia  Italy |
| 303002 | Advarra 6940 Columbia Gateway Drive  Columbia, MD, 21046  United States |
| 303042 | Advarra  6940 Columbia Gateway Drive  Columbia, MD, 21046  United States |
| 303082 | Advarra  6940 Columbia Gateway Drive  Columbia, MD, 21046  United States |
| 303429 | Advarra  6940 Columbia Gateway Drive  Columbia, MD, 21046  United States |
| 303503 | Advarra  6940 Columbia Gateway Drive  Columbia, MD, 21046  United States |
| 303821 | Advarra  6940 Columbia Gateway Drive  Columbia, MD, 21046  United States |
| 304042 | McGill University  Montreal Neurological Insitute and Hospital  Ethics Board |
| 305191 | CEIC Hospital Vall D'Hebron, Passeig Vall D'hebrón  119-129 - Edificio Materno-Infantil Planta 13, 08035, Barcelona  Spain |
| 305217 | CEIC Hospital Vall D'Hebron, Passeig Vall D'hebrón  119-129 - Edificio Materno-Infantil Planta 13, 08035, Barcelona  Spain |
| 305243 | CEIC Hospital Vall D'Hebron, Passeig Vall D'hebrón  119-129 - Edificio Materno-Infantil Planta 13, 08035, Barcelona  Spain |
| 306954 | North East - Tyne & Wear South Research Ethics Committee  Jarrow Business Centre  Viking Business Centre, Jarrow, NE32 3DT  United Kingdom |
| 308056 | CEIC Hospital Vall D'Hebron, Passeig Vall D'hebrón  119-129 - Edificio Materno-Infantil Planta 13, 08035, Barcelona  Spain |
| 308131 | North East - Tyne & Wear South Research Ethics Committee  Jarrow Business Centre  Viking Business Centre, Jarrow, NE32 3DT  United Kingdom |
| 308132 | North East - Tyne & Wear South Research Ethics Committee |
| 311910 | Vanderbilt Medical Center; Vanderbilt Institutional Review Board  1313 21st Ave. South, 504 Oxford House  Nashville, TN, 37232- 4315  United States |

Abbreviations: EC, Ethics Committee; IRB, Institutional Review Board
